# Supplementary material for: Z-Scheme versus type-II junction in g-C3N4/TiO2 and g-C3N4/SrTiO3/TiO2 heterostructures
Source: Royal Society of Chemistry journal article supplement (doi:10.1039/d1cy00451d), 2021-01-01
Supplement: d1cy00451d1.pdf [file d1cy00451d1.pdf]

## Z-Scheme versus Type-II Junction in g-C<sub>3</sub>N<sub>4</sub>/TiO<sub>2</sub> and g-C<sub>3</sub>N<sub>4</sub>/SrTiO<sub>3</sub>/TiO<sub>2</sub> Heterostructures

Giovanni Di Liberto\*, Sergio Tosoni, Gianfranco Pacchioni

Dipartimento di Scienza dei Materiali,  
Università degli Studi di Milano-Bicocca,  
Via Roberto Cozzi 55, 20125 Milano, Italy

### Supporting Information

#### S1 g-C<sub>3</sub>N<sub>4</sub> monolayers

**Table S1:** Fractional atomic coordinates of flat g-C<sub>3</sub>N<sub>4</sub> monolayer model. The lattice parameters are reported in the main text and in the first row. Atoms are reported as following: 6C, 8N.

| $a = 7.070 \text{ \AA}$ | $b = 7.070 \text{ \AA}$ | $c = 50.5 \text{ \AA}$ |
|-------------------------|-------------------------|------------------------|
| 0.2656957587196013      | 0.1552328928416662      | 0.0518100000000032     |
| 0.2547521743718770      | 0.4711845154726760      | 0.0518100000000032     |
| 0.2546972977521333      | 0.8283249433141634      | 0.0518100000000032     |
| 0.6119361026251114      | 0.8283426094879971      | 0.0518100000000032     |
| 0.9278222557374131      | 0.8173534124708075      | 0.0518100000000032     |
| 0.9278491034334427      | 0.1552442308870621      | 0.0518100000000032     |
| 0.0404621999017804      | 0.0426162149216987      | 0.0518100000000032     |
| 0.0390426973193146      | 0.3706589692826556      | 0.0518100000000032     |
| 0.0389942839224328      | 0.7131163231469421      | 0.0518100000000032     |
| 0.3699031732912905      | 0.0440329561522854      | 0.0518100000000032     |
| 0.3737948528803666      | 0.7092859818447893      | 0.0518100000000032     |
| 0.7124436692709079      | 0.0440439275373339      | 0.0518100000000032     |
| 0.3699294161485489      | 0.3706502703252353      | 0.0518100000000032     |
| 0.7124070146257565      | 0.7131227523146955      | 0.0518100000000032     |

**Table S2:** Fractional atomic coordinates of corrugated g-C<sub>3</sub>N<sub>4</sub> monolayer model. The lattice parameters are reported in the main text and in the first row. Atoms are reported as following: 6C, 8N.

| $a = 6.877 \text{ \AA}$ | $b = 6.877 \text{ \AA}$ | $c = 30.24 \text{ \AA}$ |
|-------------------------|-------------------------|-------------------------|
| 0.0920052282792464      | 0.5821613430081070      | 0.9852614808628016      |
| 0.7419661029064573      | 0.9054368764828559      | 0.0073051086664166      |
| 0.0967760836520577      | 0.9032239163479429      | 0.0000000000000000      |
| 0.4281346095150259      | 0.5718653904849740      | 0.0000000000000000      |
| 0.4178386569918931      | 0.9079947717207535      | 0.0147385191371983      |
| 0.0945631235171441      | 0.2580338970935422      | 0.9926948913335836      |
| 0.6387202636645082      | 0.0187217702526972      | 0.0187817732364113      |
| 0.0045933105434918      | 0.7130996865831856      | 0.9772338638679401      |

|                    |                    |                    |
|--------------------|--------------------|--------------------|
| 0.3143188690873339 | 0.3529918137281671 | 0.9961030709836985 |
| 0.9751196539014917 | 0.0248803460985086 | 0.0000000000000000 |
| 0.3121173685054067 | 0.6878826314945861 | 0.0000000000000000 |
| 0.9812782297473027 | 0.3612797363354919 | 0.9812182267635888 |
| 0.2869003134168143 | 0.9954066894565085 | 0.0227661361320597 |
| 0.6470081862718329 | 0.6856811309126659 | 0.0038969290163015 |

**Table S3:** Fractional atomic coordinates of corrugated (1-x2) g-C<sub>3</sub>N<sub>4</sub> monolayer model. The lattice parameters are reported in the main text and in the first row. Atoms are reported as following: 12C, 16N.

| $a = 6.832 \text{ \AA}$ | $b = 13.332 \text{ \AA}$ | $c = 50.72 \text{ \AA}$ |
|-------------------------|--------------------------|-------------------------|
| 0.4806167042707388      | 0.5900912303493672       | 0.5380132992256884      |
| 0.4883088576284274      | 0.7587411559280794       | 0.5323515464021634      |
| 0.4879443281784559      | 0.9378873369446178       | 0.5287367861995053      |
| 0.8480999136977778      | 0.9441633837643479       | 0.5211850378613249      |
| 0.1719545843016396      | 0.9407498850101957       | 0.5200513260000180      |
| 0.1709850434389356      | 0.6136781622452031       | 0.5513077547496497      |
| 0.4802801462992045      | 0.0900235099899123       | 0.5448134049846944      |
| 0.4883597466798803      | 0.2588377252002755       | 0.5504612158524850      |
| 0.4884824677703165      | 0.4381398629535614       | 0.5540690602683175      |
| 0.8485881537939951      | 0.4443853635654890       | 0.5616073578853236      |
| 0.1725204455562933      | 0.4410500436414476       | 0.5627383177078966      |
| 0.1706939315919714      | 0.1135590705716203       | 0.5314941960488678      |
| 0.2748395511161535      | 0.5477488481268930       | 0.5503204579434421      |
| 0.2947516842101593      | 0.7257646643995269       | 0.5443900904352927      |
| 0.3011262989589077      | 0.8958677950156430       | 0.5151393806000344      |
| 0.5732628508676336      | 0.5239990491651331       | 0.5378042454099351      |
| 0.6105725584737934      | 0.8783950803230186       | 0.5253166111229652      |
| 0.9542915312529263      | 0.5607983401529095       | 0.5582597138872617      |
| 0.5783797043516554      | 0.6942165903394556       | 0.5272971382239638      |
| 0.9516601012059243      | 0.8877320789007275       | 0.5146039671380619      |
| 0.2744545902977342      | 0.0475977772648567       | 0.5324848572107304      |
| 0.2947352609900991      | 0.2257643561015900       | 0.5384069743289799      |
| 0.3018000064775659      | 0.3962798712399267       | 0.5676567054003584      |
| 0.5728618946023266      | 0.0239057027342709       | 0.5450196615879876      |
| 0.6110008280834621      | 0.3786260655927006       | 0.5574773285907191      |
| 0.9538693362434029      | 0.0606135832272963       | 0.5245520317527773      |
| 0.5782093209350450      | 0.1942882040252117       | 0.5555456543324941      |
| 0.9522410927982827      | 0.3880290153367461       | 0.5681638272252937      |

## S2 TiO<sub>2</sub> (001) and (101) surface models

**Table S4:** Fractional atomic coordinates of TiO<sub>2</sub> (001) surface model. Atoms are reported as following: 10Ti, 20O.

| $a = 3.690 \text{ \AA}$ | $b = 3.822 \text{ \AA}$ | $c = 50.560 \text{ \AA}$ |
|-------------------------|-------------------------|--------------------------|
| 0.8750000161199480      | 0.3749999516401630      | 0.4991784707273216       |
| 0.8750000161199480      | 0.8750000161199480      | 0.4530788614238114       |

|                    |                    |                    |
|--------------------|--------------------|--------------------|
| 0.3749999516401630 | 0.8750000161199480 | 0.4033957318183706 |
| 0.3749999516401630 | 0.3749999516401630 | 0.3564873814444304 |
| 0.8750000161199480 | 0.3749999516401630 | 0.3069263126826495 |
| 0.8750000161199480 | 0.8750000161199480 | 0.2600040893173475 |
| 0.3749999516401630 | 0.8750000161199480 | 0.2104430205555737 |
| 0.3749999516401630 | 0.3749999516401630 | 0.1635346721816265 |
| 0.8750000161199480 | 0.3749999516401630 | 0.1138515425762000 |
| 0.8750000161199480 | 0.8750000161199480 | 0.0677519332726756 |
| 0.3749999516401630 | 0.3749999516401630 | 0.5099565758960302 |
| 0.8750000161199480 | 0.8750000161199480 | 0.4915558751084002 |
| 0.8750000161199480 | 0.3749999516401630 | 0.4611858220560811 |
| 0.3749999516401630 | 0.8750000161199480 | 0.4434952992350481 |
| 0.8750000161199480 | 0.8750000161199480 | 0.4128378815612019 |
| 0.3749999516401630 | 0.3749999516401630 | 0.3953148292413720 |
| 0.3749999516401630 | 0.8750000161199480 | 0.3645554398079763 |
| 0.8750000161199480 | 0.3749999516401630 | 0.3470622886703517 |
| 0.3749999516401630 | 0.3749999516401630 | 0.3163495084999802 |
| 0.8750000161199480 | 0.8750000161199480 | 0.2988354837143187 |
| 0.8750000161199480 | 0.3749999516401630 | 0.2680949202856855 |
| 0.3749999516401630 | 0.8750000161199480 | 0.2505808955000169 |
| 0.8750000161199480 | 0.8750000161199480 | 0.2198681153296455 |
| 0.3749999516401630 | 0.3749999516401630 | 0.2023749641920208 |
| 0.3749999516401630 | 0.8750000161199480 | 0.1716155747586324 |
| 0.8750000161199480 | 0.3749999516401630 | 0.1540925224388023 |
| 0.3749999516401630 | 0.3749999516401630 | 0.1234351047649491 |
| 0.8750000161199480 | 0.8750000161199480 | 0.1057445819439162 |
| 0.8750000161199480 | 0.3749999516401630 | 0.0753745288916040 |
| 0.3749999516401630 | 0.8750000161199480 | 0.0569738281039740 |

**Table S5:** Fractional atomic coordinates of (2x1) TiO<sub>2</sub> (101) surface model. Atoms are reported as following: 48Ti, 96O.

| $a = 7.288 \text{ \AA}$ | $b = 10.295 \text{ \AA}$ | $c = 65 \text{ \AA}$ |
|-------------------------|--------------------------|----------------------|
| 0.150164                | 0.44091                  | 0.699625             |
| 0.400164                | 0.940861                 | 0.698508             |
| 0.150164                | 0.710855                 | 0.689565             |
| 0.400164                | 0.210904                 | 0.690682             |
| 0.150164                | 0.571608                 | 0.645396             |
| 0.400164                | 0.071658                 | 0.646512             |
| 0.150164                | 0.848975                 | 0.632665             |
| 0.400164                | 0.349025                 | 0.633781             |
| 0.150164                | 0.703447                 | 0.590549             |
| 0.400164                | 0.203497                 | 0.591666             |
| 0.150164                | 0.982756                 | 0.576949             |
| 0.400164                | 0.482805                 | 0.578066             |
| 0.150164                | 0.83539                  | 0.535245             |
| 0.400164                | 0.33544                  | 0.536362             |
| 0.401172                | 0.607734                 | 0.522291             |
| 0.159596                | 0.969308                 | 0.480591             |
| 0.408985                | 0.469941                 | 0.480378             |

|          |          |          |
|----------|----------|----------|
| 0.159751 | 0.243003 | 0.466235 |
| 0.408819 | 0.739221 | 0.466356 |
| 0.168271 | 0.092616 | 0.425453 |
| 0.414488 | 0.601698 | 0.423372 |
| 0.168297 | 0.362691 | 0.410485 |
| 0.42038  | 0.873655 | 0.410722 |
| 0.650164 | 0.44091  | 0.699625 |
| 0.900164 | 0.940861 | 0.698508 |
| 0.650164 | 0.710855 | 0.689565 |
| 0.900164 | 0.210904 | 0.690682 |
| 0.650164 | 0.571608 | 0.645396 |
| 0.900164 | 0.071658 | 0.646512 |
| 0.650164 | 0.848975 | 0.632665 |
| 0.900164 | 0.349025 | 0.633781 |
| 0.650164 | 0.703447 | 0.590549 |
| 0.900164 | 0.203497 | 0.591666 |
| 0.650164 | 0.982756 | 0.576949 |
| 0.900164 | 0.482805 | 0.578066 |
| 0.650164 | 0.83539  | 0.535245 |
| 0.900164 | 0.33544  | 0.536362 |
| 0.651239 | 0.110626 | 0.521878 |
| 0.901213 | 0.607643 | 0.522552 |
| 0.657303 | 0.968849 | 0.479911 |
| 0.90849  | 0.466846 | 0.480598 |
| 0.658065 | 0.239884 | 0.467108 |
| 0.908712 | 0.740437 | 0.468018 |
| 0.671528 | 0.099538 | 0.423177 |
| 0.9232   | 0.593544 | 0.425059 |
| 0.662967 | 0.367138 | 0.413225 |
| 0.920197 | 0.862052 | 0.414852 |
| 0.151171 | 0.112078 | 0.521724 |
| 0.150164 | 0.59858  | 0.71234  |
| 0.400164 | 0.098629 | 0.713457 |
| 0.150164 | 0.89061  | 0.70171  |
| 0.400164 | 0.390659 | 0.702827 |
| 0.400164 | 0.751334 | 0.690184 |
| 0.150164 | 0.251383 | 0.691301 |
| 0.150164 | 0.531558 | 0.675526 |
| 0.400164 | 0.031509 | 0.674409 |
| 0.150164 | 0.74387  | 0.657765 |
| 0.400164 | 0.24392  | 0.658882 |
| 0.150164 | 0.030922 | 0.642587 |
| 0.400164 | 0.530971 | 0.643704 |
| 0.400164 | 0.887337 | 0.634478 |
| 0.150164 | 0.387387 | 0.635594 |
| 0.150164 | 0.672168 | 0.620708 |
| 0.400164 | 0.172218 | 0.621825 |
| 0.150164 | 0.879792 | 0.602138 |
| 0.400164 | 0.379841 | 0.603254 |
| 0.150164 | 0.164288 | 0.589592 |
| 0.400164 | 0.664238 | 0.588475 |

|          |          |          |
|----------|----------|----------|
| 0.400164 | 0.021424 | 0.579067 |
| 0.150164 | 0.521473 | 0.580183 |
| 0.150164 | 0.805377 | 0.565461 |
| 0.400164 | 0.305427 | 0.566577 |
| 0.150164 | 0.012769 | 0.546728 |
| 0.400164 | 0.512818 | 0.547845 |
| 0.150164 | 0.296771 | 0.53424  |
| 0.400164 | 0.796721 | 0.533123 |
| 0.401134 | 0.157735 | 0.523473 |
| 0.151159 | 0.653952 | 0.523983 |
| 0.154244 | 0.939499 | 0.510666 |
| 0.402939 | 0.438135 | 0.511362 |
| 0.153721 | 0.144869 | 0.491349 |
| 0.404774 | 0.642861 | 0.491433 |
| 0.158846 | 0.422097 | 0.479329 |
| 0.408002 | 0.924378 | 0.478701 |
| 0.409043 | 0.288688 | 0.467621 |
| 0.159589 | 0.786776 | 0.467909 |
| 0.165785 | 0.06847  | 0.455835 |
| 0.413957 | 0.568157 | 0.455439 |
| 0.169057 | 0.272943 | 0.435666 |
| 0.41598  | 0.773587 | 0.435279 |
| 0.171616 | 0.538863 | 0.42459  |
| 0.423019 | 0.046688 | 0.423803 |
| 0.417789 | 0.417472 | 0.40746  |
| 0.16455  | 0.921946 | 0.409789 |
| 0.162128 | 0.1846   | 0.401503 |
| 0.396477 | 0.703352 | 0.399543 |
| 0.650164 | 0.59858  | 0.71234  |
| 0.900164 | 0.098629 | 0.713457 |
| 0.650164 | 0.89061  | 0.70171  |
| 0.900164 | 0.390659 | 0.702827 |
| 0.900164 | 0.751334 | 0.690184 |
| 0.650164 | 0.251383 | 0.691301 |
| 0.650164 | 0.531558 | 0.675526 |
| 0.900164 | 0.031509 | 0.674409 |
| 0.650164 | 0.74387  | 0.657765 |
| 0.900164 | 0.24392  | 0.658882 |
| 0.650164 | 0.030922 | 0.642587 |
| 0.900164 | 0.530971 | 0.643704 |
| 0.900164 | 0.887337 | 0.634478 |
| 0.650164 | 0.387387 | 0.635594 |
| 0.650164 | 0.672168 | 0.620708 |
| 0.900164 | 0.172218 | 0.621825 |
| 0.650164 | 0.879792 | 0.602138 |
| 0.900164 | 0.379841 | 0.603254 |
| 0.650164 | 0.164288 | 0.589592 |
| 0.900164 | 0.664238 | 0.588475 |
| 0.900164 | 0.021424 | 0.579067 |
| 0.650164 | 0.521473 | 0.580183 |
| 0.650164 | 0.805377 | 0.565461 |

|          |          |          |
|----------|----------|----------|
| 0.900164 | 0.305427 | 0.566577 |
| 0.650164 | 0.012769 | 0.546728 |
| 0.900164 | 0.512818 | 0.547845 |
| 0.650164 | 0.296771 | 0.53424  |
| 0.900164 | 0.796721 | 0.533123 |
| 0.900981 | 0.157437 | 0.523615 |
| 0.650951 | 0.653784 | 0.523965 |
| 0.65309  | 0.939382 | 0.510662 |
| 0.904374 | 0.437099 | 0.511474 |
| 0.656401 | 0.14443  | 0.491503 |
| 0.905413 | 0.641427 | 0.492105 |
| 0.65828  | 0.422196 | 0.479659 |
| 0.908747 | 0.923192 | 0.478951 |
| 0.908594 | 0.28942  | 0.466988 |
| 0.65747  | 0.786924 | 0.46842  |
| 0.661027 | 0.06963  | 0.455578 |
| 0.912468 | 0.566654 | 0.45614  |
| 0.654378 | 0.275692 | 0.436437 |
| 0.905124 | 0.774056 | 0.438331 |
| 0.663885 | 0.555154 | 0.423185 |
| 0.915608 | 0.049699 | 0.425455 |
| 0.91469  | 0.419043 | 0.41014  |
| 0.677595 | 0.914542 | 0.409482 |
| 0.679438 | 0.207793 | 0.400643 |
| 0.955945 | 0.703395 | 0.403567 |

**Table S6:** Fractional atomic coordinates of SrTiO<sub>3</sub> (001) surface model. Atoms are reported as following:

5Sr, 6Ti, 17O.

| $a = \text{Å}$      | $b = \text{Å}$      | $c = 50.560 \text{ Å}$ |
|---------------------|---------------------|------------------------|
| 0.4939000321069564  | 0.4939000321069564  | 0.4139023974687427     |
| 0.4949703079089783  | 0.4949703079089783  | 0.3332221972284379     |
| 0.4956336094199208  | 0.4956336094199208  | 0.2543059999999997     |
| 0.4949703079089783  | 0.4949703079089783  | 0.1753898027715610     |
| 0.4939000321069564  | 0.4939000321069564  | 0.0947116025312516     |
| 0.9874575053701030  | 0.9874575053701029  | 0.4485223552270958     |
| -0.0080763105316143 | -0.0080763105316143 | 0.3715813878415665     |
| -0.0054374208500386 | -0.0054374208500386 | 0.2934760294830372     |
| -0.0054374208500386 | -0.0054374208500386 | 0.2151379705169638     |
| -0.0080763105316143 | -0.0080763105316143 | 0.1370306121584329     |
| 0.9874575053701029  | 0.9874575053701029  | 0.0600896447729034     |
| 0.5094576313139828  | 0.0098294192074742  | 0.4504070383793144     |
| 0.0098294192074742  | 0.5094576313139828  | 0.4504070383793144     |
| 0.0034735512469244  | 0.0034735512469244  | 0.4113925951147268     |
| 0.5037294332863256  | 0.0060805224113316  | 0.3719422707768223     |
| 0.0060805224113316  | 0.5037294332863256  | 0.3719422707768223     |
| 0.0019929915622828  | 0.0019929915622828  | 0.3327862079924270     |
| 0.5015345301683160  | 0.0027054653287902  | 0.2935548403225508     |

|                    |                    |                    |
|--------------------|--------------------|--------------------|
| 0.0027054653287902 | 0.5015345301683160 | 0.2935548403225508 |
| 0.0012301438037725 | 0.0012301438037725 | 0.2543059999999997 |
| 0.5015345301683160 | 0.0027054653287902 | 0.2150591596774506 |
| 0.0027054653287902 | 0.5015345301683160 | 0.2150591596774506 |
| 0.0019929915622828 | 0.0019929915622828 | 0.1758257920075724 |
| 0.5037294332863256 | 0.0060805224113316 | 0.1366697292231771 |
| 0.0060805224113316 | 0.5037294332863256 | 0.1366697292231771 |
| 0.0034735512469244 | 0.0034735512469244 | 0.0972214048852676 |
| 0.5094576313139828 | 0.0098294192074742 | 0.0582049616206845 |
| 0.0098294192074742 | 0.5094576313139828 | 0.0582049616206845 |

### S3 g-C<sub>3</sub>N<sub>4</sub>/TiO<sub>2</sub> interface model

**Table S7:** Fractional atomic coordinates of g-C<sub>3</sub>N<sub>4</sub>/TiO<sub>2</sub> interface model. Atoms are reported as following: 12C, 16N, 60Ti, 120O.

| $a = 7.381 \text{ \AA}$ | $b = 13.635 \text{ \AA}$ | $c = 50 \text{ \AA}$ |
|-------------------------|--------------------------|----------------------|
| 0.4716069733467858      | 0.5927709002647824       | 0.5331162577545469   |
| 0.4857293317917050      | 0.7614589322650582       | 0.5291559612853788   |
| 0.4848532684790638      | 0.9400501719665532       | 0.5271013430044122   |
| 0.8533508506318110      | 0.9414950281760610       | 0.5239033721537925   |
| 0.1602689396680320      | 0.9314112585086204       | 0.5232646725945107   |
| 0.1732501659888645      | 0.6096127432311675       | 0.5455822887828561   |
| 0.4848828103571890      | 0.0982664323342906       | 0.5408837790389481   |
| 0.4924556355277834      | 0.2650309306016049       | 0.5463393067478624   |
| 0.4813475620809990      | 0.4414744382310802       | 0.5499147511712974   |
| 0.8536582689456389      | 0.4441064448579282       | 0.5549163721064271   |
| 0.1624295648908216      | 0.4354209438933425       | 0.5562145303085888   |
| 0.1752347641697664      | 0.1093041006141360       | 0.5316604926510398   |
| 0.2681369646230627      | 0.5446960244717811       | 0.5443698831891225   |
| 0.3022170053293790      | 0.7233269790414195       | 0.5419725158279425   |
| 0.2789925269434534      | 0.8852202422371658       | 0.5175180768930500   |
| 0.5709333980739988      | 0.5349474130010692       | 0.5345245447745888   |
| 0.6120868836519988      | 0.8825814612084105       | 0.5245811146764982   |
| 0.9636152142081300      | 0.5578836070492980       | 0.5503635166415018   |
| 0.5612234389047414      | 0.6963143380045947       | 0.5214210680571028   |
| 0.9445360347261308      | 0.8792757369746900       | 0.5208632564823601   |
| 0.2712262886733198      | 0.0446419779323751       | 0.5330487344222006   |
| 0.2962102726532641      | 0.2224043299729053       | 0.5364318424850629   |
| 0.2858609754070913      | 0.3911029720405587       | 0.5615286327440822   |
| 0.5838057150059428      | 0.0399018029725138       | 0.5397857111860608   |
| 0.6126887075090850      | 0.3844299739017281       | 0.5530450930445596   |
| 0.9656805985064266      | 0.0568542796696025       | 0.5259242618656782   |
| 0.5873135022086269      | 0.2064444939263456       | 0.5494346387142748   |
| 0.9504048581810322      | 0.3861685048729263       | 0.5612484921388099   |
| 0.2968320326132374      | 0.4042627652256353       | 0.4630177219949291   |
| 0.1546032854707453      | 0.7405098500982740       | 0.4631032197959553   |
| 0.4645909442803931      | 0.0725464252920681       | 0.4617194321665629   |
| 0.7984725097020796      | 0.4055978249643828       | 0.4625062647426353   |
| 0.6534417169621671      | 0.7370758929742180       | 0.4640920756173191   |

|                    |                    |                    |
|--------------------|--------------------|--------------------|
| 0.9609903082583047 | 0.0719102617514907 | 0.4629060082918368 |
| 0.1378002976285122 | 0.2382626737946760 | 0.4164253334952960 |
| 0.4718999609977249 | 0.5725684756364627 | 0.4167810110330587 |
| 0.3028998025586241 | 0.9039970091720128 | 0.4160565371966728 |
| 0.6391611301327021 | 0.2394494483227559 | 0.4160133502116557 |
| 0.9724906368811143 | 0.5729758692881355 | 0.4165342612499722 |
| 0.8023547214764291 | 0.9032714512467769 | 0.4169334978311796 |
| 0.2195959050231500 | 0.5705916635072185 | 0.3664314381950977 |
| 0.3856457293068724 | 0.2376138306425114 | 0.3662183675158487 |
| 0.7192831191427138 | 0.5707016183475047 | 0.3664245744312947 |
| 0.5534961899593729 | 0.9037909722268803 | 0.3664126405468620 |
| 0.8862167173589038 | 0.2374922187229712 | 0.3661786407887951 |
| 0.0520083009389106 | 0.9038802310666048 | 0.3663813200828693 |
| 0.2195460687776124 | 0.0702405520752741 | 0.3189511516244560 |
| 0.5526856543078420 | 0.4039038698146732 | 0.3188952021963423 |
| 0.3850795433678908 | 0.7371684348734378 | 0.3189517244170583 |
| 0.7194986311871512 | 0.0701452997669648 | 0.3189578346828827 |
| 0.0528493504144534 | 0.4039859762857288 | 0.3188791762354293 |
| 0.8850859506633395 | 0.7372415121870922 | 0.3189569586345351 |
| 0.3024370165634044 | 0.4038689886871727 | 0.2688502857414886 |
| 0.1353001199334141 | 0.7374557202686373 | 0.2689053196556110 |
| 0.4697852333940681 | 0.0706012675319955 | 0.2688793282102769 |
| 0.8024309566971335 | 0.4038853279239745 | 0.2688652770754643 |
| 0.6352454332709980 | 0.7373941691748639 | 0.2689034904197035 |
| 0.9697357412038107 | 0.0705781066633446 | 0.2688731880384897 |
| 0.1354758898308946 | 0.2375688204086963 | 0.2215076639206212 |
| 0.4677388923306295 | 0.5708713193370063 | 0.2215387071400601 |
| 0.3021977337605788 | 0.9039816971970055 | 0.2214976075800302 |
| 0.6353914833473676 | 0.2375021820938646 | 0.2215119766974191 |
| 0.9676166199140520 | 0.5707721805056949 | 0.2215469012866722 |
| 0.8022925559281160 | 0.9040784507657958 | 0.2215062113796279 |
| 0.2181602394089102 | 0.5710792830759416 | 0.1715271240012046 |
| 0.3855809965259570 | 0.2377932529689506 | 0.1714967172131431 |
| 0.7181714520394077 | 0.5710931145786251 | 0.1715204465041268 |
| 0.5519144794028238 | 0.9041628968576230 | 0.1715166582678544 |
| 0.8855653004506114 | 0.2377878753093801 | 0.1715016644332763 |
| 0.0518809269542239 | 0.9041607408175980 | 0.1715170794071427 |
| 0.2158306219984138 | 0.0712679153633642 | 0.1243206363486786 |
| 0.5502840883405731 | 0.4045583186040473 | 0.1242764602638112 |
| 0.3838361387119470 | 0.7379691304856644 | 0.1242651218520181 |
| 0.7158646320484272 | 0.0713034131684745 | 0.1243219415490781 |
| 0.0503127527823838 | 0.4045971178436580 | 0.1242784247067687 |
| 0.8838219111727863 | 0.7379328484758961 | 0.1242607123133826 |
| 0.3011224978906691 | 0.4042920493633319 | 0.0743406940775588 |
| 0.1351095690994767 | 0.7379108460818751 | 0.0743310385530613 |
| 0.4675768917145010 | 0.0711872803223904 | 0.0743176680458909 |
| 0.8011241509753660 | 0.4042763006863912 | 0.0743409251761614 |
| 0.6350953070181324 | 0.7379102340427236 | 0.0743391142517959 |
| 0.9675896155912855 | 0.0712052189516600 | 0.0743082410151837 |
| 0.1316794581886871 | 0.2380794579644680 | 0.0280103428151959 |
| 0.4640553387065058 | 0.5713312159914711 | 0.0281080774272029 |



|                    |                    |                    |
|--------------------|--------------------|--------------------|
| 0.2987455054668644 | 0.9045308217512075 | 0.0280287653288338 |
| 0.6316964059478929 | 0.2380878379259194 | 0.0280134444632634 |
| 0.9640522570855098 | 0.5713350963757984 | 0.0281083991411025 |
| 0.7986895326120984 | 0.9044818388861813 | 0.0280254047045910 |
| 0.2340325497841240 | 0.0727318906193803 | 0.4743915824884793 |
| 0.5646854464563652 | 0.4033269746100860 | 0.4742981029616131 |
| 0.3882991186480773 | 0.7384354652780277 | 0.4739232927651055 |
| 0.7247167335436093 | 0.0708032052957850 | 0.4735732925556388 |
| 0.0659037388843531 | 0.4051825612041694 | 0.4751253569134385 |
| 0.8921597696587118 | 0.7367556734157427 | 0.4724698746255079 |
| 0.1466296701253838 | 0.2377714127421030 | 0.4554456759870742 |
| 0.4769513174213855 | 0.5708946908894905 | 0.4557988930731185 |
| 0.3115533332445858 | 0.9060674554678606 | 0.4546166330953306 |
| 0.6511575026103655 | 0.2390083276742966 | 0.4548545449456048 |
| 0.9797730115949822 | 0.5716767951587778 | 0.4552664366245925 |
| 0.8111351659972220 | 0.9050240949848422 | 0.4560016823801923 |
| 0.2954823242366972 | 0.4048441228014542 | 0.4247762100452786 |
| 0.1428503738225687 | 0.7385863504179164 | 0.4243908525949805 |
| 0.4619377934958074 | 0.0724611809710482 | 0.4235886344736182 |
| 0.7967066975974995 | 0.4055934981652757 | 0.4242083050174527 |
| 0.6393405794024254 | 0.7380277316477275 | 0.4253430386477665 |
| 0.9624938533506405 | 0.0712378381758448 | 0.4247395369731153 |
| 0.2214572966912886 | 0.5719884295209030 | 0.4068648243271339 |
| 0.3871871482447852 | 0.2398738534986679 | 0.4067562773139176 |
| 0.7212580603287696 | 0.5727500486623323 | 0.4069612053896635 |
| 0.5547022691681324 | 0.9051346900071379 | 0.4068528803898613 |
| 0.8875929873020358 | 0.2390446039607602 | 0.4066958290876612 |
| 0.0516614285520262 | 0.9037760285444633 | 0.4068729970965903 |
| 0.1348081761226707 | 0.2364283981015589 | 0.3758407189280146 |
| 0.4694857888711337 | 0.5704884341281219 | 0.3760690877273393 |
| 0.3023658402450259 | 0.9035160112488492 | 0.3756627217725475 |
| 0.6358872244174479 | 0.2374843812706150 | 0.3756394143689021 |
| 0.9692115736332267 | 0.5704127972366588 | 0.3758742715787357 |
| 0.8023221148588846 | 0.9034280285491083 | 0.3760986764783584 |
| 0.2192820121848219 | 0.0705560518670380 | 0.3581743589397657 |
| 0.5516920578042970 | 0.4039606856891568 | 0.3581447995304698 |
| 0.3862958898613817 | 0.7372113434811617 | 0.3581963656305799 |
| 0.7195360309036469 | 0.0705191550551544 | 0.3581581562464675 |
| 0.0530858854046020 | 0.4039946715086257 | 0.3581271887488933 |
| 0.8856122149641512 | 0.7372924439791815 | 0.3581888379161507 |
| 0.2191382052377933 | 0.5706086767605720 | 0.3271371733189645 |
| 0.3857533685988341 | 0.2372587464060603 | 0.3270527792320861 |
| 0.7190779121205356 | 0.5705943319179330 | 0.3271546103078503 |
| 0.5531534686052663 | 0.9037975649398868 | 0.3271279222269725 |
| 0.8861123685230833 | 0.2372730284366029 | 0.3270283705418838 |
| 0.0517666290403258 | 0.9038617572950265 | 0.3271172054516169 |
| 0.3025895580587969 | 0.4039088540669005 | 0.3093756399111455 |
| 0.1355303270104859 | 0.7374267024422692 | 0.3094419203729986 |
| 0.4693834853312049 | 0.0702414220116736 | 0.3094362801784905 |
| 0.8024354189723326 | 0.4037796221313351 | 0.3094032610727731 |
| 0.6351626420309799 | 0.7370349237311686 | 0.3094188357587717 |

|                    |                    |                    |
|--------------------|--------------------|--------------------|
| 0.9697734794651560 | 0.0706143980243348 | 0.3094042829395009 |
| 0.2198304921132189 | 0.0707018478883046 | 0.2783677844398286 |
| 0.5525845490595224 | 0.4040481127229729 | 0.2783404402291615 |
| 0.3855770381672454 | 0.7375065035964747 | 0.2783816000215921 |
| 0.7197742780399796 | 0.0706681549424901 | 0.2783730838969247 |
| 0.0525669600076475 | 0.4040194224004375 | 0.2783328981561931 |
| 0.8855731132419453 | 0.7374983475713939 | 0.2783905454184895 |
| 0.1361431909870708 | 0.2373636054051912 | 0.2607118076052672 |
| 0.4689377084424471 | 0.5707303961744177 | 0.2607130556221817 |
| 0.3026475654104835 | 0.9040584331646239 | 0.2607139413710983 |
| 0.6361077558807546 | 0.2373499760148818 | 0.2607169838545887 |
| 0.9688916060431869 | 0.5707169925769988 | 0.2607373117530886 |
| 0.8027092493935029 | 0.9040615964923882 | 0.2607166938163926 |
| 0.3015801122246429 | 0.4040632927648450 | 0.2296331464059181 |
| 0.1349550256232101 | 0.7374107218103156 | 0.2296659960100555 |
| 0.4687917178379238 | 0.0707160808705778 | 0.2296510803291476 |
| 0.8015175614904964 | 0.4040285979804056 | 0.2296527323098548 |
| 0.6350003966721506 | 0.7374466066995059 | 0.2296608925399151 |
| 0.9688188811108958 | 0.0707546168011624 | 0.2296375353989843 |
| 0.2178175444825095 | 0.5707008458192699 | 0.2120257646575940 |
| 0.3852825807732994 | 0.2374695842875317 | 0.2119891664994941 |
| 0.7178285191835204 | 0.5707014913449108 | 0.2120241620482779 |
| 0.5519197234754817 | 0.9038907394580918 | 0.2120055518667255 |
| 0.8852286881163309 | 0.2374766867210683 | 0.2119915202941259 |
| 0.0519059875883704 | 0.9038992442792817 | 0.2120013636216481 |
| 0.1355313613836651 | 0.2378625739930557 | 0.1809492557946858 |
| 0.4682539864758540 | 0.5711239453255560 | 0.1809735215442055 |
| 0.3021461673743340 | 0.9043485923618994 | 0.1809488664671299 |
| 0.6355392545469540 | 0.2378840006846613 | 0.1809343867442997 |
| 0.9682734383350557 | 0.5711555108342686 | 0.1809877946529916 |
| 0.8021691527867586 | 0.9043839667045570 | 0.1809518939297574 |
| 0.2184953390243125 | 0.0710759924260698 | 0.1634739620276228 |
| 0.5520130477328963 | 0.4044603538370573 | 0.1634452081266127 |
| 0.3851328629531265 | 0.7376931840328660 | 0.1634645635036741 |
| 0.7185036488547502 | 0.0710770586211181 | 0.1634758091832616 |
| 0.0520245311071304 | 0.4044708619227292 | 0.1634484308097550 |
| 0.8851577046994852 | 0.7376904331918882 | 0.1634656801735619 |
| 0.2165768460979685 | 0.5711317825919388 | 0.1323018935915621 |
| 0.3829509747784263 | 0.2377792152124404 | 0.1322932351256952 |
| 0.7166195214871144 | 0.5711234880688388 | 0.1323003483400068 |
| 0.5495809868368202 | 0.9043554664682710 | 0.1323257453329792 |
| 0.8829241331941304 | 0.2377977475910094 | 0.1322989937443595 |
| 0.0495972230565725 | 0.9043435142350810 | 0.1323257503524207 |
| 0.2997231639314065 | 0.4042067025265070 | 0.1148357540807947 |
| 0.1333564295139089 | 0.7376188734040723 | 0.1148377249020067 |
| 0.4657707868253301 | 0.0708156912465160 | 0.1148491452202263 |
| 0.7997410859159868 | 0.4042275661004496 | 0.1148354583610488 |
| 0.6333484646985509 | 0.7376034554631152 | 0.1148440761132022 |
| 0.9657667312595469 | 0.0708144743207231 | 0.1148492876684857 |
| 0.2160900419199122 | 0.0714546408225419 | 0.0838648984205911 |
| 0.5496118086703525 | 0.4046284957026223 | 0.0838484497359086 |

|                    |                    |                    |
|--------------------|--------------------|--------------------|
| 0.3834097889406786 | 0.7381701710160132 | 0.0838478891587482 |
| 0.7161193445279815 | 0.0714753357732389 | 0.0838694137553974 |
| 0.0496189933210272 | 0.4046263756100563 | 0.0838491174174339 |
| 0.8834204270667162 | 0.7381683833146778 | 0.0838408904312334 |
| 0.1237937082934597 | 0.2379230490963158 | 0.0663341415023192 |
| 0.4569287276190824 | 0.5712031713490898 | 0.0664191587605076 |
| 0.2906791392446386 | 0.9045835139410221 | 0.0663474172473916 |
| 0.6238064802927336 | 0.2379340876314928 | 0.0663420945005914 |
| 0.9569564135503561 | 0.5712086473100408 | 0.0664165807398477 |
| 0.7906615581316950 | 0.9045689706662049 | 0.0663386722974567 |
| 0.3187612767085072 | 0.4046022201567117 | 0.0355474675344732 |
| 0.1524595492767315 | 0.7379031402760555 | 0.0355630393243648 |
| 0.4858715844227051 | 0.0712694580989288 | 0.0355443697872657 |
| 0.8187885911414253 | 0.4046111696463330 | 0.0355496741458824 |
| 0.6524160897870218 | 0.7378760082462462 | 0.0355650402671350 |
| 0.9858602684463221 | 0.0712551863162464 | 0.0355373188080227 |
| 0.2340580848838234 | 0.5713381698641763 | 0.0164298216983656 |
| 0.4012797151889987 | 0.2378993827858729 | 0.0163615087979044 |
| 0.7340461573582325 | 0.5713376237958996 | 0.0164313444386541 |
| 0.5681707508812588 | 0.9045707160231280 | 0.0163800463110292 |
| 0.9012664200780153 | 0.2378913146114705 | 0.0163615428511671 |
| 0.0681843179861148 | 0.9045666414177554 | 0.0163781064324507 |

#### S4 g-C<sub>3</sub>N<sub>4</sub>/SrTiO<sub>3</sub>/TiO<sub>2</sub> interface model

**Table S8:** Fractional atomic coordinates of g-C<sub>3</sub>N<sub>4</sub>/SrTiO<sub>3</sub>/TiO<sub>2</sub> interface model. Atoms are reported as following: 12C, 16N, 30Sr, 96Ti, 222O.

| $a = 7.662 \text{ \AA}$ | $b = 13.817 \text{ \AA}$ | $c = 60 \text{ \AA}$ |
|-------------------------|--------------------------|----------------------|
| 0.4332327412116360      | 0.1788737786499328       | 0.2065889993573469   |
| 0.4537340410992992      | 0.3478591510897265       | 0.2068054474811027   |
| 0.4429149627483095      | 0.5233750893217402       | 0.2089854964046337   |
| 0.8260402861788151      | 0.5255981772748928       | 0.2120605387392422   |
| 0.1208007711210070      | 0.5117463543220940       | 0.2093486835121789   |
| 0.1418615785229775      | 0.1899197800582240       | 0.1953108218881198   |
| 0.4565630675864522      | 0.6903250234080406       | 0.2050919900464160   |
| 0.4619252206690924      | 0.8539658521477647       | 0.2011053071590053   |
| 0.4344838631792377      | 0.0223077106839901       | 0.1950873899912001   |
| 0.8222382857849654      | 0.0235764177413120       | 0.1906481259500760   |
| 0.1186420389256634      | 0.0112343600243831       | 0.1899250306531812   |
| 0.1507424024205820      | 0.6957451235171470       | 0.2115171608692216   |
| 0.2300319320612671      | 0.1254058229210749       | 0.1978198782173327   |
| 0.2737990864198335      | 0.3036236593225417       | 0.1957673630367562   |
| 0.2276809866987719      | 0.4606802859848893       | 0.2106980730767842   |
| 0.5298672253607788      | 0.1224489692410048       | 0.2062382435871416   |
| 0.5769954677475843      | 0.4690073559041155       | 0.2097663422981269   |
| 0.9348589936356583      | 0.1376864023660837       | 0.1923390671860262   |
| 0.5251669175067679      | 0.2867240913223751       | 0.2148594784308498   |
| 0.9078661243833891      | 0.4637326306940183       | 0.2079881814949427   |
| 0.2408525558704916      | 0.6319196232747010       | 0.2080797250314085   |

|                    |                    |                    |
|--------------------|--------------------|--------------------|
| 0.2663203912624659 | 0.8080828687838603 | 0.2086212249316667 |
| 0.2363396726052903 | 0.9651089970432752 | 0.1867805596599965 |
| 0.5562091999042718 | 0.6352464442671180 | 0.2057381834384991 |
| 0.5728954430582948 | 0.9664728590529778 | 0.1934642166007321 |
| 0.9455837744762235 | 0.6398603827058049 | 0.2179093515722262 |
| 0.5616401082060449 | 0.8009318548655463 | 0.2010379937446125 |
| 0.9093902617612559 | 0.9620020728272013 | 0.1864341823926379 |
| 0.2445242704931122 | 0.2237491214165641 | 0.5635830395165639 |
| 0.7449002105137654 | 0.2240389928188558 | 0.5628793606020923 |
| 0.0838222737578418 | 0.5632693235794562 | 0.5615625335490786 |
| 0.5838716519301231 | 0.5632679507363652 | 0.5622021563648496 |
| 0.4045750806647510 | 0.8842172891207112 | 0.5634773535674882 |
| 0.9053975791382745 | 0.8850612750892148 | 0.5645104809676365 |
| 0.2389998509383827 | 0.2138791488053575 | 0.4955198632518794 |
| 0.7381672694619037 | 0.2144139164646442 | 0.4966005657716338 |
| 0.0679284433608168 | 0.5453501654442121 | 0.4943384467149874 |
| 0.5665474488617890 | 0.5452847307739208 | 0.4927308491112850 |
| 0.4007836846730941 | 0.8781324211250736 | 0.4951631501792710 |
| 0.9018663169717670 | 0.8798135187129769 | 0.4935186685172418 |
| 0.2252119661106331 | 0.2006170803323889 | 0.4282922292191601 |
| 0.7255656312787798 | 0.2004367549607463 | 0.4266589862872367 |
| 0.0537371323673437 | 0.5311080040780858 | 0.4240643432666455 |
| 0.5560185559255647 | 0.5319925891207078 | 0.4260694656840207 |
| 0.3930505385251420 | 0.8690066765143604 | 0.4246383730290797 |
| 0.8911893854019634 | 0.8665670572351581 | 0.4268895815023852 |
| 0.2132257931010604 | 0.1870884124693840 | 0.3581019792845190 |
| 0.7108355356147079 | 0.1881062471923174 | 0.3600075370210276 |
| 0.0403556230456880 | 0.5168755252363633 | 0.3575119028984559 |
| 0.5396837660081149 | 0.5162913018606151 | 0.3558039903958880 |
| 0.3782270306079876 | 0.8540779958327189 | 0.3589371344352250 |
| 0.8819681833747683 | 0.8564100572561554 | 0.3568012619558373 |
| 0.1971357405501565 | 0.1738454611119971 | 0.2908092932250545 |
| 0.6969019286239906 | 0.1732758759864075 | 0.2886810638088051 |
| 0.0214863381592982 | 0.5020873709770981 | 0.2870450938554686 |
| 0.5278695338166444 | 0.5001801324688011 | 0.2888468525656936 |
| 0.3681939442758278 | 0.8473409558462003 | 0.2883724261955387 |
| 0.8751579294506657 | 0.8423309137484178 | 0.2921970416536609 |
| 0.0000000000000000 | 0.0000000000000000 | 0.0000000000000000 |
| 0.5000000261020148 | 0.0000000000000000 | 0.9999999983335073 |
| 0.3333399273606119 | 0.3333886854941710 | 0.0003535114467397 |
| 0.8333399534626338 | 0.3333886854941710 | 0.0003535097802470 |
| 0.1666798286192090 | 0.6667773709883420 | 0.0007070228933088 |
| 0.6666798547212309 | 0.6667773709883420 | 0.0007070212268161 |
| 0.1716647966328324 | 0.1612558211742225 | 0.9618721906314107 |
| 0.6716648227348543 | 0.1612558211742225 | 0.9618721889649251 |
| 0.0050046978914295 | 0.4946445066683935 | 0.9622257037446431 |
| 0.5050047239934514 | 0.4946445066683935 | 0.9622257020781575 |
| 0.3383446252520486 | 0.8280331921625645 | 0.9625792151913899 |
| 0.8383446513540633 | 0.8280331921625645 | 0.9625792135248972 |
| 0.4132132902690913 | 0.1565432194327769 | 0.9221083831671706 |
| 0.9132133163711060 | 0.1565432194327769 | 0.9221083815006779 |

|                    |                    |                    |
|--------------------|--------------------|--------------------|
| 0.2465531915276884 | 0.4899319049269479 | 0.9224618962804030 |
| 0.7465532176297032 | 0.4899319049269479 | 0.9224618946139103 |
| 0.0798930927862855 | 0.8233205904211189 | 0.9228154093936354 |
| 0.5798931188883003 | 0.8233205904211189 | 0.9228154077271427 |
| 0.0720608129004988 | 0.3142323664316179 | 0.8823058869197201 |
| 0.5720459291096919 | 0.3142350063854490 | 0.8823095089979721 |
| 0.4067149401741035 | 0.6476642826377889 | 0.8824730832017251 |
| 0.9067201359013366 | 0.6476630194264577 | 0.8824712198876064 |
| 0.2378228852184330 | 0.9797465004261812 | 0.8822529746267892 |
| 0.7378270341023883 | 0.9797537873628935 | 0.8822508620276595 |
| 0.3129515938318439 | 0.3018780612486506 | 0.8409954826411079 |
| 0.8129057263220393 | 0.3018567598232414 | 0.8409987179386325 |
| 0.1457167306339006 | 0.6350237997550483 | 0.8410781246326523 |
| 0.6457059956134896 | 0.6350189322501737 | 0.8410771593380448 |
| 0.4784559951325779 | 0.9682739635314641 | 0.8409567805867881 |
| 0.9784400971533685 | 0.9682735115896188 | 0.8409561428918092 |
| 0.1363612449500358 | 0.1246654112110880 | 0.8008285458503975 |
| 0.6363631093607719 | 0.1246763010993088 | 0.8008266236241814 |
| 0.4695852772991628 | 0.4581179420231125 | 0.8008017985268193 |
| 0.9695943760871636 | 0.4581309129878425 | 0.8008016888786170 |
| 0.3018862268469698 | 0.7912219074909067 | 0.8007985950435862 |
| 0.8019259958490275 | 0.7912279649804469 | 0.8007987156831792 |
| 0.3770254245583031 | 0.1123084631422780 | 0.7595023019712527 |
| 0.8770320357410557 | 0.1123201219460705 | 0.7595088939210540 |
| 0.2098719346740077 | 0.4460310666563474 | 0.7595228936259367 |
| 0.7098170959510024 | 0.4460079131838335 | 0.7595172361182057 |
| 0.0434404139196271 | 0.7791853064896755 | 0.7595075103665230 |
| 0.5434152214640506 | 0.7791774015724124 | 0.7595041307464306 |
| 0.0322215623197064 | 0.2690924502132713 | 0.7194974190530167 |
| 0.5323771047833605 | 0.2690710822807776 | 0.7194984075396271 |
| 0.3657296649163400 | 0.6024596595570385 | 0.7193654390127758 |
| 0.8657397443122725 | 0.6024561623814729 | 0.7193608218628691 |
| 0.1987998573289873 | 0.9356014576299249 | 0.7193523282406724 |
| 0.6988473876608964 | 0.9356689965186091 | 0.7193616161363460 |
| 0.2759161216352248 | 0.2565909895113268 | 0.6783422672409101 |
| 0.7759986265332478 | 0.2566727101372500 | 0.6782893310579377 |
| 0.1104836766970509 | 0.5907655114739746 | 0.6781069156607245 |
| 0.6102433074081346 | 0.5906650173557515 | 0.6780973347634505 |
| 0.4420791663813836 | 0.9224811493187112 | 0.6780761041376965 |
| 0.9421426239442708 | 0.9225927312077553 | 0.6780731589465593 |
| 0.1020939645822497 | 0.0849498822841360 | 0.6385292936084090 |
| 0.6022924291557393 | 0.0850010073899480 | 0.6385472720356236 |
| 0.4346657938676283 | 0.4177587020987713 | 0.6385533226133521 |
| 0.9348620333429907 | 0.4179803992566091 | 0.6385306992522560 |
| 0.2617512227201615 | 0.7514906337317676 | 0.6380270743230254 |
| 0.7621518215609561 | 0.7515138093263449 | 0.6379964572415633 |
| 0.3317071705787948 | 0.0616643244346777 | 0.5984442817037943 |
| 0.8314088934513952 | 0.0616766635788522 | 0.5984169755427510 |
| 0.1640372009122953 | 0.3938065189397075 | 0.5982924440292327 |
| 0.6638390586472299 | 0.3936794947089116 | 0.5983216513985989 |
| 0.4900003465608982 | 0.7213356992698883 | 0.5970886841957757 |

|                    |                    |                    |
|--------------------|--------------------|--------------------|
| 0.9919138149992054 | 0.7213050959507876 | 0.5970730393266134 |
| 0.3204941745045136 | 0.0495627885123434 | 0.5311892641703383 |
| 0.8230946482821114 | 0.0495762201042833 | 0.5311680865040742 |
| 0.1595487360042441 | 0.3847309459963612 | 0.5309127437621166 |
| 0.6545414183507540 | 0.3847720922488775 | 0.5309361136669191 |
| 0.4905431127022343 | 0.7169404110254529 | 0.5277248014112182 |
| 0.9847594162223826 | 0.7168425716869484 | 0.5276698513496880 |
| 0.3180863054417206 | 0.0393117635344664 | 0.4626700186419193 |
| 0.8109608008201350 | 0.0395426873208639 | 0.4628446432109091 |
| 0.1436405964064324 | 0.3719726340301238 | 0.4623948444069304 |
| 0.6505050944456942 | 0.3723793803128300 | 0.4622448172210646 |
| 0.4733755033205133 | 0.7053351726611311 | 0.4589278220100763 |
| 0.9829065908802969 | 0.7054336493594026 | 0.4591023921930441 |
| 0.2975915143501326 | 0.0266675188444465 | 0.3943366842391885 |
| 0.8067711610427919 | 0.0268399220403483 | 0.3941363312206534 |
| 0.1378621761825398 | 0.3592036203344204 | 0.3938950770320287 |
| 0.6301284138434285 | 0.3589665110711414 | 0.3938908250389351 |
| 0.4712430027409651 | 0.6922014505179610 | 0.3906300773155011 |
| 0.9609045536171897 | 0.6920071063941552 | 0.3905884532913299 |
| 0.2946401968714197 | 0.0132305205229397 | 0.3262658201867724 |
| 0.7835177134342621 | 0.0124428442330860 | 0.3264132956972290 |
| 0.1153329410609830 | 0.3437076796839869 | 0.3256142177325825 |
| 0.6226209796407831 | 0.3444584436687356 | 0.3255687406017995 |
| 0.4490331799849130 | 0.6784758412235715 | 0.3236146368667446 |
| 0.9582552839904731 | 0.6776987285493427 | 0.3229501984467168 |
| 0.1069482820353586 | 0.3300149435490181 | 0.2587150260812907 |
| 0.6030314404004199 | 0.3283010199576140 | 0.2582262741416752 |
| 0.4556989218727353 | 0.6723822644479173 | 0.2607811513690407 |
| 0.9440382513140879 | 0.6681954292637823 | 0.2566886750872102 |
| 0.2700109827858362 | 0.9981226216257759 | 0.2595011873300438 |
| 0.7849134320195844 | 0.9974496882182685 | 0.2586186719428507 |
| 0.2849532054749346 | 0.0014118149452571 | 0.0092985498075748 |
| 0.7849532185259420 | 0.0014118149452571 | 0.0092985481409968 |
| 0.1182931067335318 | 0.3348005004394281 | 0.0096520612541369 |
| 0.6182931328355536 | 0.3348005004394281 | 0.0096520595876441 |
| 0.4516330340941508 | 0.6681891859335991 | 0.0100055727008765 |
| 0.9516330601961656 | 0.6681891859335991 | 0.0100055710343838 |
| 0.1955187613287777 | 0.1659510545191125 | 0.9943577911592385 |
| 0.6955187874307995 | 0.1659510545191125 | 0.9943577894927458 |
| 0.0288586756383893 | 0.4993397400132835 | 0.9947113026058929 |
| 0.5288586886893967 | 0.4993397400132835 | 0.9947113009393149 |
| 0.3621986029990012 | 0.8327284255074545 | 0.9950648140526326 |
| 0.8621986160500086 | 0.8327284255074545 | 0.9950648123860546 |
| 0.3227476921899921 | 0.3289570743166479 | 0.9685100762996228 |
| 0.8227477182920069 | 0.3289570743166479 | 0.9685100746331301 |
| 0.1560875978029657 | 0.6623457511135769 | 0.9688635893582784 |
| 0.6560876108539802 | 0.6623457511135769 | 0.9688635876917004 |
| 0.4894078083246569 | 0.9955684062169610 | 0.9681565566290473 |
| 0.9894078344266717 | 0.9955684062169610 | 0.9681565549625546 |
| 0.4158285892763729 | 0.1604012212670227 | 0.9550559454151397 |
| 0.9158286153783948 | 0.1604012212670227 | 0.9550559437486470 |

|                    |                    |                    |
|--------------------|--------------------|--------------------|
| 0.2491684905349700 | 0.4937899067611937 | 0.9554094585283721 |
| 0.7491685166369848 | 0.4937899067611937 | 0.9554094568618794 |
| 0.0825083917935672 | 0.8271785922553647 | 0.9557629716416045 |
| 0.5825084178955819 | 0.8271785922553647 | 0.9557629699751118 |
| 0.1639566643546644 | 0.1573115687697637 | 0.9289921845118059 |
| 0.6639566904566792 | 0.1573115687697637 | 0.9289921828453203 |
| 0.4972965917152763 | 0.4907002542639347 | 0.9293456959585527 |
| 0.9972966178172911 | 0.4907002542639347 | 0.9293456942920599 |
| 0.3306364929738734 | 0.8240889397581057 | 0.9296992074051147 |
| 0.8306365190758882 | 0.8240889397581057 | 0.9296992057386220 |
| 0.0785681298643581 | 0.3220726837390657 | 0.9156688392224765 |
| 0.5785681559663800 | 0.3220726837390657 | 0.9156688375559838 |
| 0.4119080572249771 | 0.6554613692332367 | 0.9160223506692162 |
| 0.9119080833269919 | 0.6554613692332367 | 0.9160223490027235 |
| 0.2452282459990229 | 0.9886840156393859 | 0.9153153195519010 |
| 0.7452282721010377 | 0.9886840156393859 | 0.9153153178854083 |
| 0.4097060060297478 | 0.1505946076407119 | 0.8890416597005226 |
| 0.9096968148543035 | 0.1505910603362811 | 0.8890394183401683 |
| 0.2434010671231633 | 0.4841553862347773 | 0.8893649402731593 |
| 0.7434183632616421 | 0.4841587513757363 | 0.8893674695342693 |
| 0.0758015615185691 | 0.8166155872684993 | 0.8894806743921087 |
| 0.5758087358036498 | 0.8166175834431364 | 0.8894776779718450 |
| 0.3259655954723724 | 0.3166651151640912 | 0.8745635868226366 |
| 0.8259645945157444 | 0.3166621517913446 | 0.8745641904765503 |
| 0.1586449683661524 | 0.6493164744939633 | 0.8746924209723934 |
| 0.6586360815851404 | 0.6493104108769810 | 0.8746920083562053 |
| 0.4909860639671687 | 0.9818416845031607 | 0.8745177229861983 |
| 0.9909940604570223 | 0.9818406847992101 | 0.8745166133181734 |
| 0.0593102093869121 | 0.3000449301553443 | 0.8487608624448030 |
| 0.5593205672476498 | 0.3000469304490652 | 0.8487651325299251 |
| 0.3928690231359838 | 0.6335406737185245 | 0.8489010559146748 |
| 0.8928850339202196 | 0.6335435877457384 | 0.8489036988860270 |
| 0.2253765386743119 | 0.9662245209810025 | 0.8486915415890445 |
| 0.7253871488120975 | 0.9662265089743490 | 0.8486903114009829 |
| 0.1411556724561311 | 0.1320751536488410 | 0.8339081702536922 |
| 0.6411608633195269 | 0.1320816847892498 | 0.8339057612469879 |
| 0.4747019451718358 | 0.4655790534503178 | 0.8339226424691399 |
| 0.9746941458014358 | 0.4655768692316143 | 0.8339227568486292 |
| 0.3075218859858036 | 0.7986471670195711 | 0.8338971650013450 |
| 0.8075348163433712 | 0.7986509720304868 | 0.8338938239113671 |
| 0.3072157929239199 | 0.2944215024588860 | 0.8078993816716905 |
| 0.8072077032181468 | 0.2944190635168163 | 0.8078963352287359 |
| 0.1402461463959921 | 0.6276014234742019 | 0.8079265714408748 |
| 0.6402508164986039 | 0.6276014865922972 | 0.8079270628362529 |
| 0.4735452703991991 | 0.9608896025294330 | 0.8078594984199253 |
| 0.9735543305647860 | 0.9608901132730262 | 0.8078581622990737 |
| 0.3888829538958162 | 0.1264047086782411 | 0.7930793552585731 |
| 0.8888836638368662 | 0.1264048309556828 | 0.7930775484458947 |
| 0.2222099163103294 | 0.4598660805274888 | 0.7930634483144626 |
| 0.7222111201175783 | 0.4598661007136391 | 0.7930668630220848 |
| 0.0551565594338642 | 0.7928734827518295 | 0.7930543553761363 |

|                    |                    |                    |
|--------------------|--------------------|--------------------|
| 0.5551651339473108 | 0.7928757046189109 | 0.7930532812011797 |
| 0.1230173356443132 | 0.1107132484688283 | 0.7672400369947207 |
| 0.6230268280063704 | 0.1106978018052517 | 0.7672346627008150 |
| 0.4564654418030834 | 0.4442635288612421 | 0.7672449267855197 |
| 0.9565057083546570 | 0.4442917401165312 | 0.7672423327524858 |
| 0.2894928969366952 | 0.7773666983180593 | 0.7672261793874864 |
| 0.7894851544253102 | 0.7773785994481781 | 0.7672266882253458 |
| 0.0378511731242274 | 0.2762967704169295 | 0.7525168190344754 |
| 0.5379491492023195 | 0.2763126966288363 | 0.7525185433815601 |
| 0.3711926085431989 | 0.6096822350555744 | 0.7524544258513680 |
| 0.8711314925808012 | 0.6096925456232516 | 0.7524590167346902 |
| 0.2044597531443666 | 0.9429059017572154 | 0.7524659891980918 |
| 0.7044968110551993 | 0.9429128433000425 | 0.7524622699414947 |
| 0.3713930411147506 | 0.1050421479915043 | 0.7264356993098017 |
| 0.8714153524924623 | 0.1050335145225915 | 0.7264371641110977 |
| 0.2048588291182295 | 0.4386150097097875 | 0.7264314404043033 |
| 0.7047451251601055 | 0.4386168679446872 | 0.7264315816076895 |
| 0.0381099439803563 | 0.7718295077380519 | 0.7264078939076124 |
| 0.5380043813283351 | 0.7718148201445648 | 0.7264037316334734 |
| 0.2865719500443557 | 0.2708209061868204 | 0.7118145930562966 |
| 0.7866253108301069 | 0.2708721908699372 | 0.7118082216617205 |
| 0.1199238618401776 | 0.6041879448800109 | 0.7116645995769751 |
| 0.6200450727717267 | 0.6043140714823415 | 0.7116448572986330 |
| 0.4529552838220916 | 0.9371941499210278 | 0.7116361929751563 |
| 0.9528560271916169 | 0.9371164232355100 | 0.7116345098858518 |
| 0.0198887070488976 | 0.2545577430035162 | 0.6859606795647157 |
| 0.5200454506384402 | 0.2545493724268096 | 0.6859716931275676 |
| 0.3536992080114276 | 0.5883786268203723 | 0.6858322139884977 |
| 0.8536811183962845 | 0.5883827463777497 | 0.6858311384273965 |
| 0.1868255917766129 | 0.9215634285742876 | 0.6858203422677748 |
| 0.6868784007791385 | 0.9215418959075001 | 0.6858126982445097 |
| 0.1016467260252900 | 0.0874684732079813 | 0.6712727150468634 |
| 0.6017839547833305 | 0.0875267871530952 | 0.6712390685089294 |
| 0.4349066214675882 | 0.4207727219189100 | 0.6713129673682291 |
| 0.9349651154808161 | 0.4207738105067168 | 0.6712795418450275 |
| 0.2672510536235919 | 0.7541414460259211 | 0.6711470795493836 |
| 0.7673114847984198 | 0.7542099395237718 | 0.6710173076933671 |
| 0.2703970296339681 | 0.2489478156217027 | 0.6453929906434590 |
| 0.7704709025446531 | 0.2489954149759151 | 0.6453425065843500 |
| 0.1036979270216326 | 0.5820499873157396 | 0.6451170079568946 |
| 0.6036190522454880 | 0.5818799437738111 | 0.6451001947904076 |
| 0.4376166482271955 | 0.9163622741666668 | 0.6451205988367729 |
| 0.9378911396185922 | 0.9165636914378530 | 0.6450691847789085 |
| 0.3468817046866214 | 0.0770305798733906 | 0.6313041611833677 |
| 0.8465625222713672 | 0.0770327953816224 | 0.6313082678816170 |
| 0.1771473730922279 | 0.4074685029064796 | 0.6313224966898454 |
| 0.6774378730829771 | 0.4074878595402285 | 0.6313236453245062 |
| 0.0128000763235810 | 0.7425576635557078 | 0.6311980130669098 |
| 0.5138363563817201 | 0.7425629668041691 | 0.6311940632241595 |
| 0.1021669074793597 | 0.0825858512678713 | 0.6041768911078508 |
| 0.6013062796054076 | 0.0817010671197535 | 0.6040289528683191 |



|                    |                    |                    |
|--------------------|--------------------|--------------------|
| 0.4249030746139439 | 0.4052948425826290 | 0.6045947338456540 |
| 0.9263448569856553 | 0.4066150096385059 | 0.6044520507247011 |
| 0.2607803425057165 | 0.7412028385272849 | 0.6039205315923181 |
| 0.7608037273355304 | 0.7412036387058655 | 0.6033499244015192 |
| 0.5096730098932343 | 0.2378862879933438 | 0.5919705262841213 |
| 0.0053338192628876 | 0.2379264955953764 | 0.5919263322144228 |
| 0.3322960113266475 | 0.5629625510425217 | 0.5932177067809923 |
| 0.8327030516876611 | 0.5628831458863268 | 0.5931802623137996 |
| 0.1783133166653392 | 0.9080322624035644 | 0.5939109887157510 |
| 0.6770484656672142 | 0.9079845542468102 | 0.5939281483572174 |
| 0.3270623088096307 | 0.0628281333854442 | 0.5627687571909860 |
| 0.8406876688565006 | 0.0625450508150805 | 0.5627790007861742 |
| 0.1744933761608101 | 0.3958551962521852 | 0.5624839404688933 |
| 0.6595441539577596 | 0.3954065002526264 | 0.5624703153191878 |
| 0.4957237103826020 | 0.7310072687365760 | 0.5658690850311444 |
| 0.0064557556848178 | 0.7311848597777979 | 0.5658895545555342 |
| 0.0800585200537641 | 0.0593954526840750 | 0.5258443580480060 |
| 0.5906045706626140 | 0.0700924017403580 | 0.5286478802409889 |
| 0.4195491532777015 | 0.3988924684948381 | 0.5251237610938631 |
| 0.9113274729442264 | 0.3908049439279793 | 0.5276247722027367 |
| 0.4851040703311144 | 0.2245912010053425 | 0.5290576896050005 |
| 0.0026486046004611 | 0.2245864934445184 | 0.5292719741366211 |
| 0.2466641419496964 | 0.7270288076077992 | 0.5319886637692480 |
| 0.7489371875172508 | 0.7290752376404155 | 0.5345602422343269 |
| 0.3222896738121283 | 0.5565884831474646 | 0.5300000104336272 |
| 0.8288567670989326 | 0.5566449664670959 | 0.5301373451899524 |
| 0.1659497470190860 | 0.8911641874775649 | 0.5296276560386955 |
| 0.6542104447959758 | 0.8912251672521950 | 0.5296746157571914 |
| 0.3339300413143768 | 0.0484407494710158 | 0.4940004741099020 |
| 0.8086353258744863 | 0.0491438203552467 | 0.4941200271662780 |
| 0.1411762702788604 | 0.3788402266620970 | 0.4936670341934842 |
| 0.6626443366541102 | 0.3802218653776526 | 0.4935592889727561 |
| 0.5011973948042234 | 0.7166211501119765 | 0.4976541451674003 |
| 0.9708999665134338 | 0.7160490570653767 | 0.4975959345146841 |
| 0.0628344600424177 | 0.0459821792028664 | 0.4598742628689696 |
| 0.5575758856294871 | 0.0400988859072452 | 0.4554162723475598 |
| 0.4757312801858381 | 0.2087527354869093 | 0.4611454162496142 |
| 0.9627399574478046 | 0.2085670747069655 | 0.4608117462604444 |
| 0.3918409625369109 | 0.3748938877150038 | 0.4588106341024522 |
| 0.8980720912397333 | 0.3804068087279416 | 0.4556618849355523 |
| 0.3061047892166182 | 0.5424058233321843 | 0.4623770662208635 |
| 0.8017914598784914 | 0.5423636074182066 | 0.4619379818066492 |
| 0.2282543058585488 | 0.7110501283296082 | 0.4674636602156027 |
| 0.7282211620603078 | 0.7117813521119268 | 0.4624250200191644 |
| 0.1369113112481025 | 0.8759749890449935 | 0.4620800475197329 |
| 0.6375737380810251 | 0.8761336370621087 | 0.4621936724887932 |
| 0.2899647699193527 | 0.0350868193727044 | 0.4254569490873704 |
| 0.8227121144866085 | 0.0338781095906871 | 0.4252441984078707 |
| 0.1503281432675462 | 0.3673450292313593 | 0.4250932337143586 |
| 0.6257729646128994 | 0.3655898794275470 | 0.4251856806394360 |
| 0.4518761841861852 | 0.7023057606860816 | 0.4290510162867361 |

|                    |                    |                    |
|--------------------|--------------------|--------------------|
| 0.9951730379622453 | 0.7031380794406414 | 0.4292307238541407 |
| 0.0458326998143879 | 0.0280354221526641 | 0.3866243280627596 |
| 0.5481099327555964 | 0.0310213634595819 | 0.3918343914219417 |
| 0.4521835353856100 | 0.1954475523928745 | 0.3926781454480333 |
| 0.9597631739980966 | 0.1956430806770276 | 0.3930103281201688 |
| 0.3831467647159628 | 0.3656566841690378 | 0.3872207179990937 |
| 0.8795466318919374 | 0.3626156079310385 | 0.3904303112871441 |
| 0.2897540505164627 | 0.5289726718247121 | 0.3934057966062960 |
| 0.7913437760116367 | 0.5291945765299451 | 0.3941649484356302 |
| 0.2155832599052313 | 0.6982775719693896 | 0.3935344802738739 |
| 0.7149072739457882 | 0.6977480734417905 | 0.3995853233457798 |
| 0.1221470075655263 | 0.8624045797830653 | 0.3937300876838589 |
| 0.6255646150337201 | 0.8625060659818103 | 0.3932166490686887 |
| 0.3138635201966313 | 0.0229532376077484 | 0.3573688482501332 |
| 0.7795978916601169 | 0.0264077925100950 | 0.3572543102056205 |
| 0.1119358568519071 | 0.3506924176632225 | 0.3567516703187396 |
| 0.6347770723972044 | 0.3535687718277993 | 0.3569754514937057 |
| 0.4834895088340352 | 0.6886331031891116 | 0.3607195927272025 |
| 0.9370415515967019 | 0.6886380346750426 | 0.3608296891531057 |
| 0.0369864250583453 | 0.0183653377687546 | 0.3242882317226132 |
| 0.5401845715239790 | 0.0203522719820812 | 0.3188205252424328 |
| 0.4460821539161071 | 0.1833214967395899 | 0.3246568298488746 |
| 0.9480019994461807 | 0.1828286831291737 | 0.3229992700094007 |
| 0.3728164709103341 | 0.3545883845929181 | 0.3223014683035803 |
| 0.8744078635388739 | 0.3553969573463770 | 0.3199223510832815 |
| 0.2834531736142288 | 0.5185644923371289 | 0.3257871296158834 |
| 0.7818682712542331 | 0.5176904584125288 | 0.3259826565860114 |
| 0.2056202972590951 | 0.6860800333487789 | 0.3319031126908144 |
| 0.7073244041630640 | 0.6891948776746221 | 0.3259791115321390 |
| 0.1193203997093500 | 0.8503725625714339 | 0.3259092925335695 |
| 0.6102649203356955 | 0.8505126528505266 | 0.3264792761493125 |
| 0.1259498363982805 | 0.3480565649953051 | 0.2892364835482609 |
| 0.6074451787275341 | 0.3433091970413549 | 0.2893250579807182 |
| 0.4311776440049144 | 0.6820813686623548 | 0.2930075642162765 |
| 0.9682088103414125 | 0.6767857085911094 | 0.2929781645555044 |
| 0.2604557227182384 | 0.0071656283545655 | 0.2902123615521171 |
| 0.7908206928596340 | 0.9975717616621695 | 0.2891395363199844 |
| 0.4283923663923876 | 0.1700033895723330 | 0.2588598084034125 |
| 0.9337988395387143 | 0.1697533580648178 | 0.2586807184669435 |
| 0.3573340686477441 | 0.3445869436039010 | 0.2528319162239311 |
| 0.8609267085995027 | 0.3447163923997281 | 0.2549423122207098 |
| 0.2811116637106278 | 0.5158176332779744 | 0.2567709979806788 |
| 0.7677705367516663 | 0.5095332513247256 | 0.2578931843493231 |
| 0.1868396720494954 | 0.6757359508812463 | 0.2612815302319521 |
| 0.6951035448471985 | 0.6751646088439133 | 0.2663231095063738 |
| 0.0888877304180404 | 0.8359706741166325 | 0.2584426320594518 |
| 0.5951543185024010 | 0.8323888581309504 | 0.2542735974054639 |
| 0.5157308891071500 | 0.0029356639505305 | 0.2562618041695994 |

## S5 Lattice strain calculation

The g-C<sub>3</sub>N<sub>4</sub>/TiO<sub>2</sub> and g-C<sub>3</sub>N<sub>4</sub>/SrTiO<sub>3</sub>/TiO<sub>2</sub> interfaces are made by a g-C<sub>3</sub>N<sub>4</sub> monolayers supported on the oxide semiconductors, having a thickness (~2nm) sufficient to obtain converged electronic properties. Therefore, it is a reasonable approximation to release the strain on g-C<sub>3</sub>N<sub>4</sub>, by fixing the lattice parameters,  $a$ ,  $b$  and  $\gamma$  to those of the semiconductors. 2D unit cell, is defined by 3 variables, two lattice vectors, and the angle between the two. Therefore, it is important to mention that the calculation of lattice strain should include not only the lattice parameters  $a$ , and  $b$ , but also the lattice angle  $\gamma$ . Namely, the applied strain on g-C<sub>3</sub>N<sub>4</sub> can be calculated as follows:

$$\epsilon_a(\%) = \frac{(a_{oxide} - a_{g-C_3N_4})}{a_{oxide}} * 100 \quad (Eq. S1)$$

$$\epsilon_b(\%) = \frac{(b_{oxide} - b_{g-C_3N_4})}{b_{oxide}} * 100 \quad (Eq. S2)$$

$$\epsilon_\gamma(\%) = \frac{(\gamma_{oxide} - \gamma_{g-C_3N_4})}{\gamma_{oxide}} * 100 \quad (Eq. S3)$$

Where  $\epsilon_a(\%)$ ,  $\epsilon_b(\%)$ , and  $\epsilon_\gamma(\%)$  are the applied strains on  $a$ ,  $b$ , and  $\gamma$  lattice parameters. The working lattice vectors, *i.e.* those imposed in the simulation box of the interface will be those of the oxide.
